# Supplementary material for: Nanophotosensitizers Composed of Phenyl Boronic Acid Pinacol Ester-Conjugated Chitosan Oligosaccharide via Thioketal Linker for Reactive Oxygen Species-Sensitive Delivery of Chlorin e6 against Oral Cancer Cells
Source: MDPI journal article supplement (doi:10.3390/ma15207057), 2022-10-11
Supplement: s1 [file s1]

# Supplementary Materials

## Experimental

### Characterization of chemicals and conjugates

$^1\text{H}$  NMR spectra (500 MHz NB Fourier transform (FT)-NMR spectrometer, Varian Unity Inova; Varian Inc., Santa Clara, CA, USA) was employed to confirm chemical composition and synthesis procedures of conjugates. Each component and conjugates were dissolved in DMSO or mixtures of  $\text{D}_2\text{O}$ /DMSO for analysis.

## Results

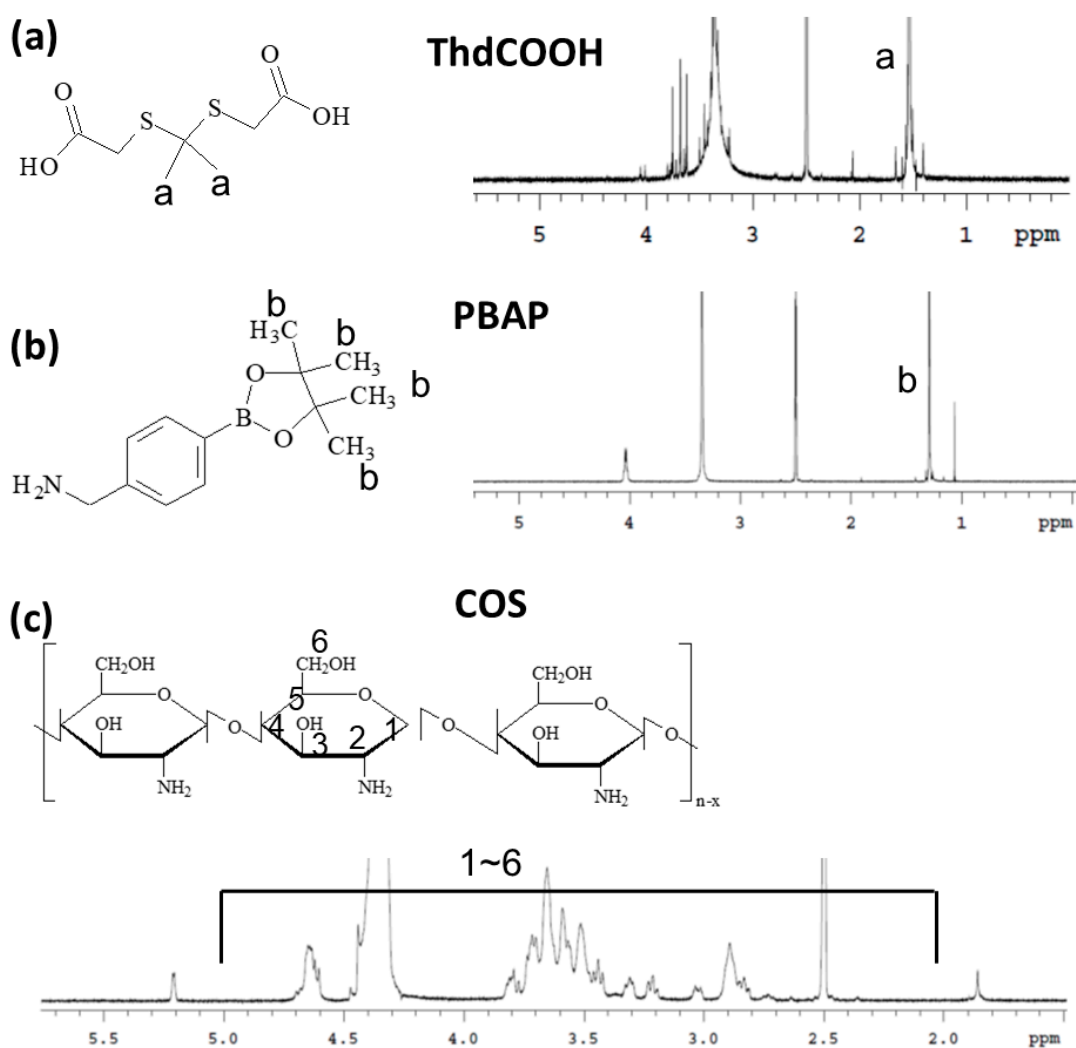

**Figure S1.** Chemical structure and  $^1\text{H}$  NMR spectra. (a) ThdCOOH; (b) PBAP; (c) COS.

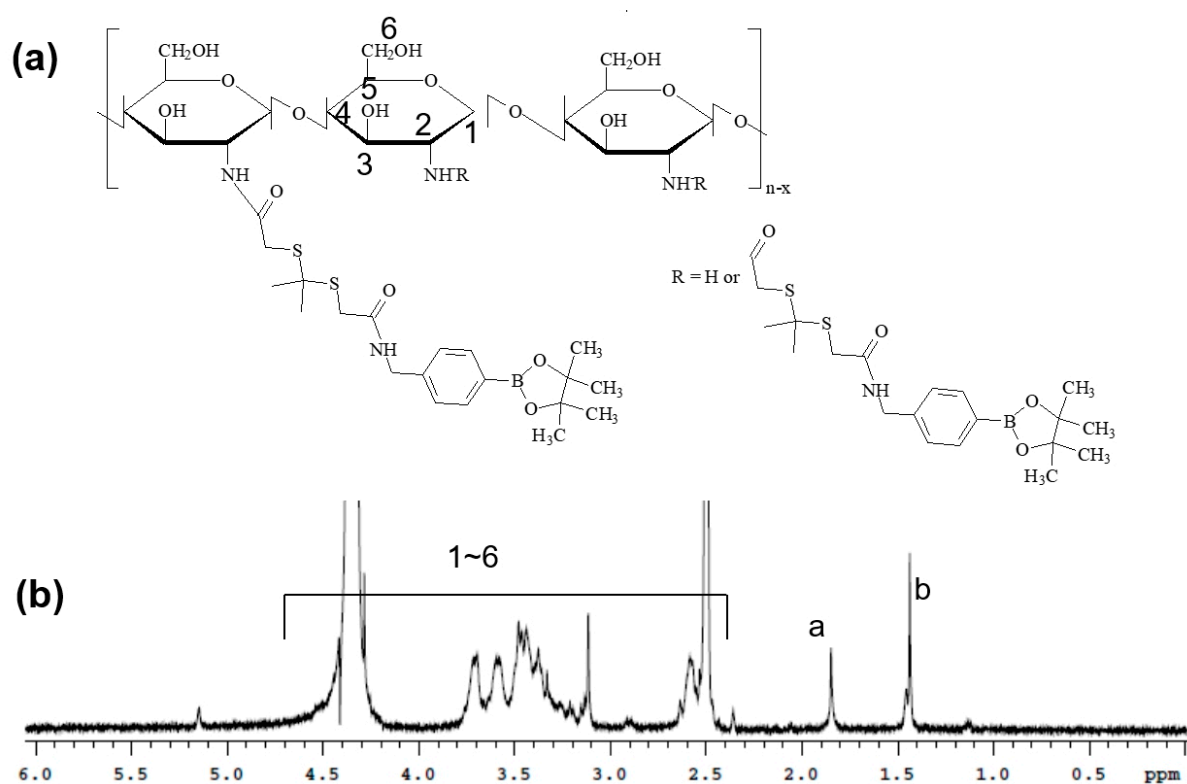

Figure S2. Chemical structure (a) and  $^1\text{H}$  NMR spectra (b) of COSthPBAP conjugates.
